1 Rapid selection of P323L in the SARS-CoV-2 polymerase (NSP12) in humans and non-human  
2 primate models and confers a large plaque phenotype

3 Xiaofeng Dong<sup>1†</sup>, Hannah Goldswain<sup>1†</sup>, Rebekah Penrice-Randal<sup>1†</sup>, Ghada T. Shawli<sup>1†</sup>, Tessa  
4 Prince<sup>1,2†</sup>, Maia Kavanagh Williamson<sup>3†</sup>, Nadine Randle<sup>1</sup>, Benjamin Jones<sup>1</sup>, Francisco J  
5 Salguero<sup>4</sup>, Julia A. Tree<sup>4</sup>, Yper Hall<sup>4</sup>, Catherine Hartley<sup>1</sup>, Maximilian Erdmann<sup>3</sup>, James Bazire<sup>3</sup>,  
6 Tuksin Jearanaiwitayakul<sup>3,5</sup>, ISARIC4C investigators, Malcolm G. Semple<sup>1,2,6</sup>, Peter J. M.  
7 Openshaw<sup>7</sup>, J. Kenneth Baillie<sup>8</sup>, Stevan R. Emmett<sup>9,10</sup>, Paul Digard<sup>8</sup>, David A. Matthews<sup>3</sup>, Lance  
8 Turtle<sup>1,2</sup>, Alistair Darby<sup>1</sup>, Andrew D. Davidson<sup>3</sup>, Miles W. Carroll<sup>2,4,11</sup> and Julian A. Hiscox<sup>1,2,12\*</sup>.

9 <sup>1</sup>Institute of Infection, Veterinary and Ecological Sciences, University of Liverpool, UK.

10 <sup>2</sup>NIHR Health Protection Unit in Emerging and Zoonotic Infections, Liverpool, UK.

11 <sup>3</sup>School of Cellular and Molecular Medicine, University of Bristol, UK.

12 <sup>4</sup>UK Health Security Agency, Porton Down, UK.

13 <sup>5</sup>Department of Microbiology, Mahidol University, Thailand.

14 <sup>6</sup>Department of Respiratory Medicine, Alder Hey Children's Hospital, Liverpool, UK.

15 <sup>7</sup>National Heart and Lung Institute, Imperial College London, UK.

16 <sup>8</sup>The Roslin Institute, University of Edinburgh, UK.

17 <sup>9</sup>Royal United Hospitals Bath NHS Foundation Trust, UK.

18 <sup>10</sup>Bristol Medical School University of Bristol, UK.

19 <sup>11</sup>Nuffield Department of Medicine, University of Oxford, UK.

20 <sup>12</sup>A\*STAR Infectious Diseases Laboratories (A\*STAR ID Labs), Agency for Science, Technology  
21 and Research (A\*STAR), Singapore.

22 <sup>†</sup>These authors contributed equally.

23 Correspondence: [julian.hiscox@liverpool.ac.uk](mailto:julian.hiscox@liverpool.ac.uk)

24 **Abstract**

25 The mutational landscape of SARS-CoV-2 varies at both the dominant viral genome sequence  
26 and minor genomic variant population. An early change associated with transmissibility was the  
27 D614G substitution in the spike protein. This appeared to be accompanied by a P323L  
28 substitution in the viral polymerase (NSP12), but this latter change was not under strong  
29 selective pressure. Investigation of P323L/D614G changes in the human population showed  
30 rapid emergence during the containment phase and early surge phase of wave 1 in the UK. This  
31 rapid substitution was from minor genomic variants to become part of the dominant viral  
32 genome sequence. A rapid emergence of 323L but not 614G was observed in a non-human  
33 primate model of COVID-19 using a starting virus with P323 and D614 in the dominant genome  
34 sequence and 323L and 614G in the minor variant population. In cell culture, a recombinant  
35 virus with 323L in NSP12 had a larger plaque size than the same recombinant virus with P323.  
36 These data suggest that it may be possible to predict the emergence of a new variant based on  
37 tracking the distribution and frequency of minor variant genomes at a population level, rather  
38 than just focusing on providing information on the dominant viral genome sequence e.g.,  
39 consensus level reporting. The ability to predict an emerging variant of SARS-CoV-2 in the global  
40 landscape may aid in the evaluation of medical countermeasures and non-pharmaceutical  
41 interventions.

## 42 Introduction

43 There are many distinct lineages of SARS-CoV-2 currently circulating worldwide and some that  
44 have become extinct <sup>1</sup>. Sequence data show that that the genome of SARS-CoV-2 is changing as  
45 the pandemic continues. Replication and transcription of the SARS-CoV-2 genome directly  
46 drives three types of genetic change in the virus. The first is recombination, and this is a natural  
47 consequence of the way in which the virus synthesizes its subgenomic messenger RNAs  
48 (sgmRNAs). This may account for insertions and deletions, for example observed in and around  
49 the furin cleavage site in the spike glycoprotein <sup>2</sup> and other genes <sup>3</sup>. The second driver of  
50 genetic change is the continual accruing of point mutations. These changes may confer  
51 advantages in transmission, such as the A23402G, encoding the D614G substitution in the spike  
52 protein <sup>4</sup>, which has come to predominate in global SARS-CoV-2 sequences since the start of the  
53 outbreak <sup>5</sup>. Such point mutations may be driven <sup>5</sup> by errors during RNA synthesis by the viral  
54 encoded RNA dependent RNA polymerase (NSP12) and larger replication complex and/or by  
55 host mediated processes <sup>6,7</sup>. The third mechanism is the potential generation and selection of  
56 new transcription regulatory signals (TRSs) and the synthesis of new viral sgmRNAs and proteins  
57 <sup>8</sup>. Promiscuous recombination and mutation in coronaviruses may allow these viruses to  
58 overcome selection pressures, transit population bottlenecks and result in the emergence of  
59 new variants <sup>9,10</sup>.

60 This variation exists in individual humans/animals infected with SARS-CoV-2, where there will  
61 be a dominant viral genome sequence(s) with minor genomic variants <sup>10</sup>. These latter genomes  
62 will have both synonymous (non-coding) and non-synonymous (coding) variations (changes)  
63 around the dominant viral genome sequence. These variations may be selected for and become

64 the dominant viral genome sequence when the virus enters a new host, as has been  
65 demonstrated with the adaptation of Ebola virus in a guinea pig model of infection <sup>11</sup>.  
66 Alternatively, the variation may exist at a minor variant level but nevertheless impact upon  
67 virus biology, for example with the Ebola virus RNA dependent RNA polymerase (L protein) and  
68 the relationship with overall viral load in patients with Ebola virus disease <sup>12</sup>.

69 Since the start of the COVID-19 pandemic different dominant viral genome sequences and non-  
70 synonymous changes appear to rise and fall in the SARS-CoV-2 global sequences <sup>1</sup>. The D614G  
71 spike protein variant of SARS-CoV-2 was first observed in February 2020 and by May 2020  
72 approximately 80% of viruses sequenced contained this substitution. The major clade  
73 containing D614G (Pango lineages B.1 and sub-lineages) contained potentially linked  
74 substitutions, including C14407U in NSP12 that confers a P323L substitution. However, some  
75 lineages, such as A.19 and A.2.4, gained D614G in the spike protein but not P323L in NSP12 <sup>13</sup>.

76 Therefore, whether P323L in NSP12 conferred a fitness advantage and was subject to selection  
77 pressure is unknown. To investigate the within host selection pressure for the P323L variant,  
78 sequential samples from patients with COVID-19 prior to and during the D614G/P323L change  
79 in the UK were sequenced to study both the dominant viral genome sequence and minor  
80 variant genomes. Additionally, a lineage B SARS-CoV-2 with 323L and 614G in the minor variant  
81 population was used to infect two non-human primate models <sup>13</sup>, cynomolgus (*Macaca*  
82 *fascicularis*) and rhesus (*Macaca mulatta*) macaques. Longitudinal sampling indicated that 323L  
83 became part of the dominant viral genome sequence, but not 614G. Reverse genetics analysis  
84 of P323L in the background of a 614G virus indicated that the 323L variant grew with a larger  
85 plaque phenotype. Overall, this change provided an additive advantage to D614G in the spike

86 protein. In the wider context the work indicated that an emerging dominant sequence could be  
87 predicted by analysis of minor variant genomes.

## 88 RESULTS

89 **Identification of a P323L substitution in NSP12 in the same human patient.** To identify  
90 whether the P323L substitution occurred rapidly in NSP12, nasopharyngeal swabs were  
91 identified in the ISARIC-4C biobank that were obtained from patients infected with lineage B  
92 SARS-CoV-2 prior to the major shift from P323 to 323L and D614 to 614G. Samples were further  
93 down selected based on clinical information providing a dates of symptom onset, first sample  
94 and subsequent longitudinal samples. This provided samples from a total of 472  
95 nasopharyngeal swabs. RNA was isolated from the swabs and used as templates for the  
96 amplification of SARS-CoV-2 genome and sgmRNAs using both short (ARTIC-Illumina) and  
97 longer-read length (Rapid Sequencing Long Amplicons-Nanopore, RSLA-Nanopore) <sup>14,15</sup>.  
98 Longitudinal samples from 12 patients had sufficient read depth to call a consensus for the  
99 dominant viral genome sequence in each sample and to derive information on the frequency of  
100 minor genomic variants, focusing on codon 323 in NSP12 and 614 in the spike protein. In one  
101 patient, who was admitted to the intensive care unit at the Royal Liverpool Hospital, both  
102 sequencing approaches indicated that the P323L and D614G substitution occurred in the SARS-  
103 CoV-2 genome between the 1<sup>st</sup> sample and 2<sup>nd</sup> samples taken two days apart (Figure 1A and 1B,  
104 respectively). To independently confirm this observation, the source RNA was Sanger  
105 sequenced with primers to generate longer amplicons around the potential substitution sites.  
106 The data validated that for NSP12 the codon encoding the amino acid at position 323 changed  
107 from CCU (encoding P) to CUU (encoding L) (Figure 1C). For the spike protein, the codon  
108 encoding the amino acid at position 614 changed from GAU (encoding D) to GGU (encoding G)  
109 (Figure 1C). Therefore, the data suggested that both P323L and D614G were rapidly selected in

110 the patient over a two-to-three-day period. Another possibility is that the patient was infected  
111 with a P323/D614 variant and subsequently became infected with a 323L/614G variant through  
112 nosocomial infection in the hospital setting. However, we consider this possibility unlikely; as  
113 this patient was one of the first cases admitted to the intensive care unit of Liverpool University  
114 Hospitals, when there were relatively few other patients present in the hospital at that period  
115 of the containment phase.

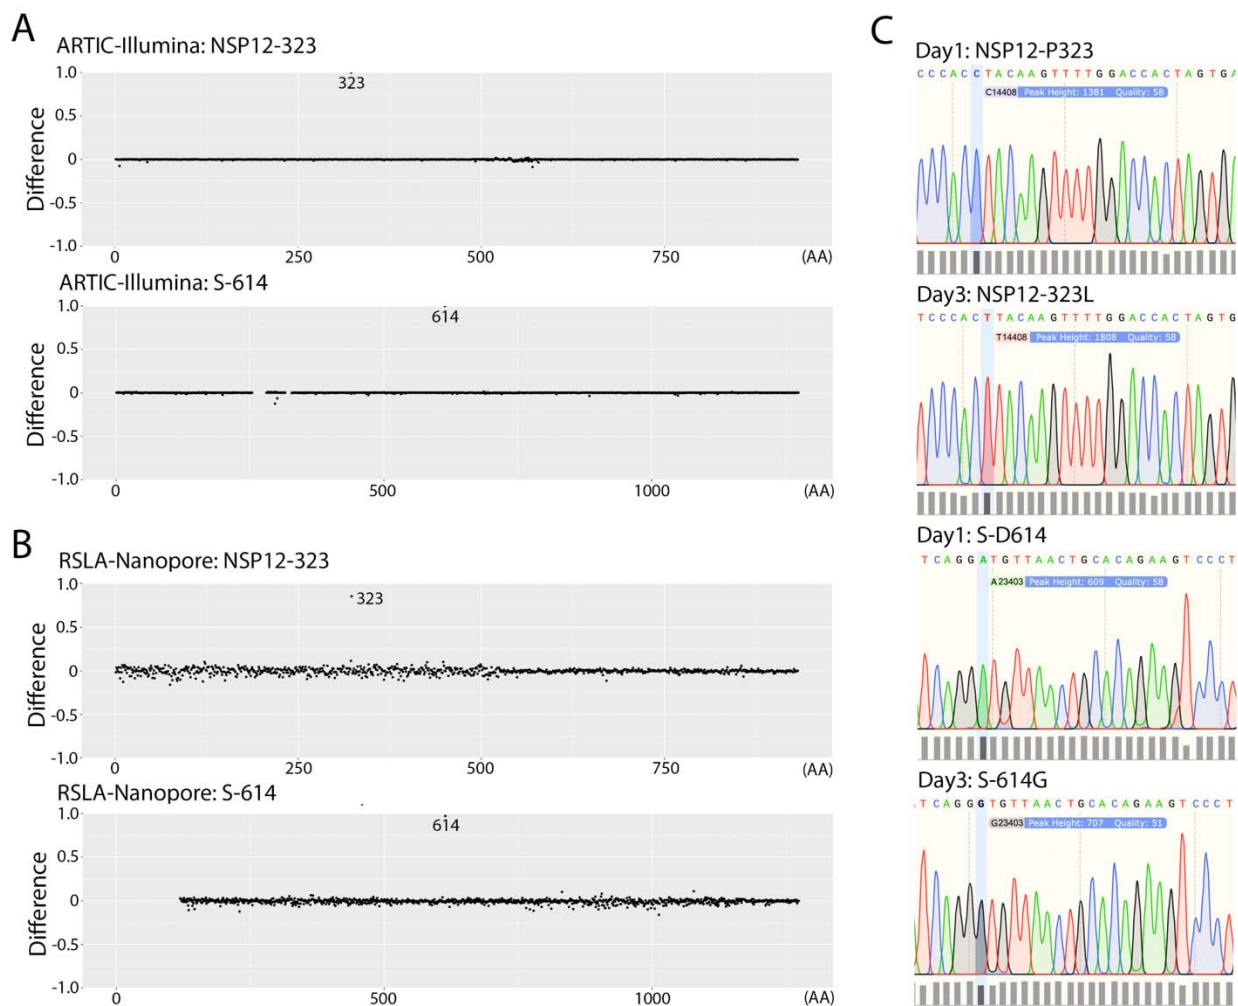

116  
117 *Figure 1. Sequence analysis and amino acid substitution in NSP12 (P323L) and the spike protein*  
118 *(D614G) between an initial sample and one taken two days later in a single patient. Three*



119 *different sequencing approaches were used: (A) an ARTIC -Illumina approach and (B) an RSLA-*  
120 *Nanopore approach. Individual dots represent a codon position on either NSP12 or the spike*  
121 *protein compared to the Wuhan reference sequence. The difference between the sampling days*  
122 *is indicated by a positive difference indicating divergence of the day 3 sequence away from the*  
123 *Wuhan-Hu-1 complete genome reference sequence (NC\_045512), and a negative difference*  
124 *indicating divergence of the first sample taken towards the Wuhan reference sequence. In both*  
125 *cases considering the ratio of a particular position for dominant viral genome sequence versus*  
126 *minor variant. (C) Sanger sequence analysis of the amplicons used to investigate the dominant*  
127 *viral genome sequence around the sites within NSP12 (codon 323) and spike protein (codon 614)*  
128 *that changed between the first and third days of sampling in a patient hospitalized with COVID-*  
129 *19.*

130

131 The distribution of P323L and D614G at the minor genomic variant level was evaluated in the  
132 human population between January 2020 and June 2020, when these substitutions became  
133 part of the dominant viral genome sequence. SARS-CoV-2 was sequenced from nasopharyngeal  
134 swabs sampled from 522 patients over that time and usable data obtained from 377 (Figure 2).

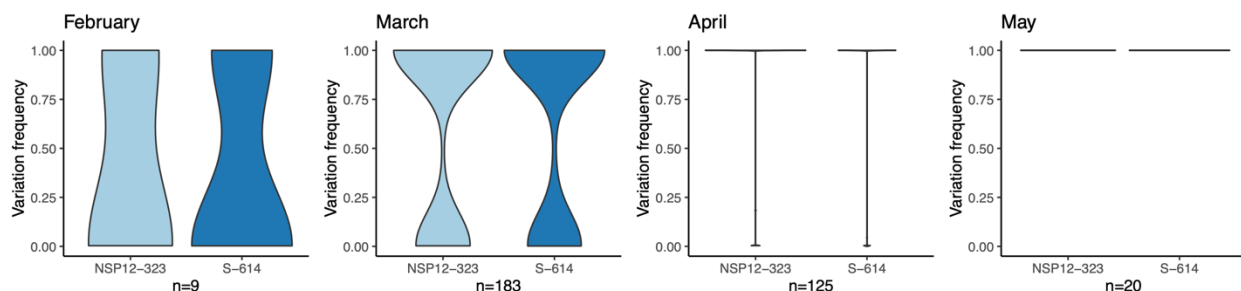

135

136 *Figure 2. Analysis of the ratio of P323L (light blue) and D614G (blue) at a dominant viral genome*

137 *sequence and minor variant genomes in 377 patients between February 2020 and May 2020 in*

138 *the UK. SARS-CoV-2 sequence was obtained from nasopharyngeal swabs from 377 hospitalized*  
139 *patients. The width of the violin plot indicates the number of samples/patients with the*  
140 *frequency on the y-axis. The data shows the transition from P323L and D614G over time in the*  
141 *minor variant genomes, such that by April 2020 in the UK, the 323L and 614G substitutions were*  
142 *part of the dominant viral genome sequence and by May 2020, there was no evidence of P323*  
143 *and D614.*

144

145 The data (Figure 2) indicated that there was increasing prevalence from P323 to 323L and D614  
146 to 614G in the February to March sampling period. For both February and March 2020, patients  
147 had mixed populations of P323L and D614G. However, for the patients sampled in April and  
148 May 2020 the dominant viral genome sequence in each patient had 323L and 614G, suggesting  
149 either strong selection pressure and/or multiple founder effects.

#### 150 **Longitudinal analysis of variation in non-human primates and cell culture**

151 To investigate whether the P323L substitution was driven by strong selection pressure,  
152 nasopharyngeal swabs were taken longitudinally from cynomolgus and rhesus macaques (12  
153 animals of each species, a mix of males and females) that had been infected with an isolate of  
154 SARS-CoV-2 prior to the P323L and D614G changes; SARS-CoV-2 Victoria/01/202040, that had  
155 been sampled on the 24<sup>th</sup> January 2020 <sup>16</sup>. The isolate had been passaged three times in cell  
156 culture to generate stock virus prior to infection of the cynomolgus and rhesus macaques.  
157 Sequencing of the stock virus indicated a very low proportion of NSP12 323L and spike 614G  
158 (Figure 3).



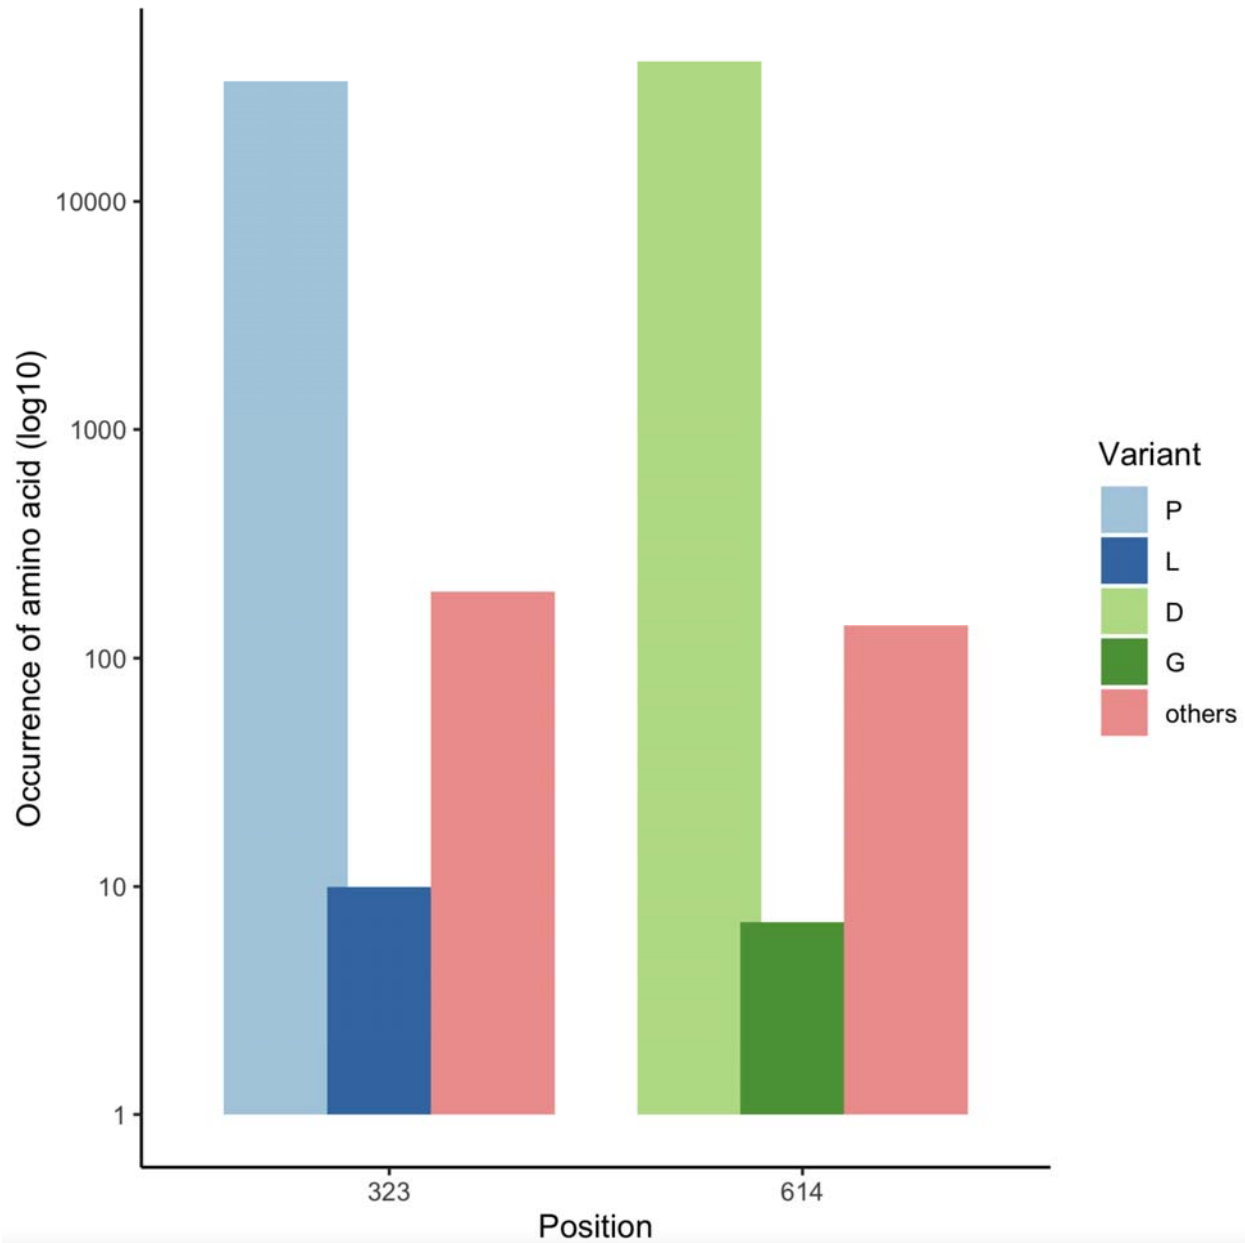

160

161 *Figure 3. Histogram showing the amino acid coverage at position 323 in NSP12 and 614 in the*  
162 *spike protein in the SARS-CoV-2 Victoria/01/202040 stock as determined by ARTIC-Illumina*  
163 *sequencing. Site coverage is shown on the y-axis. The proportion of amino acids mapped are*  
164 *shown, light blue or light green is the P323 or D614 at the 323 positions in NSP12 and 614 in the*  
165 *spike protein, respectively. The proportion of the L or G in NSP12 and the spike protein,*

166 *respectively, is indicated in dark blue and dark green, respectively. The frequency of other amino*  
167 *acids at those positions is indicated in pink. We note that data were obtained through an ARTIC-*  
168 *Illumina based approach and as such PCR duplicates could not be removed. This may impact on*  
169 *the reported ratios.*

170

171 Nasal washes were taken daily from each animal during infection <sup>13</sup>. RNA was purified and  
172 sequenced using two independent approaches, shotgun sequencing on an Illumina platform  
173 and via ARTIC-Illumina with the latter for specifically sequencing SARS-CoV-2 RNA. Dominant  
174 viral genome sequence and minor genomic variants were determined for SARS-CoV-2 for each  
175 sample in which genome coverage could be obtained. To obtain a global overview and identify  
176 whether there were any hot spots for minor genomic variants, these were plotted as an  
177 average over the course of the infections in the non-human primates (NHPs) (Figure 4). The  
178 data indicated that minor genomic variants occurred throughout the genome, but the greatest  
179 variation occurred at position 14,408 in the orf1ab region, which resulted in a C to U change.  
180 This resulted in a non-synonymous change in NSP12 with the substitution of P323L (amino acid  
181 position 4715 with respect to the ORF1AB polyprotein).

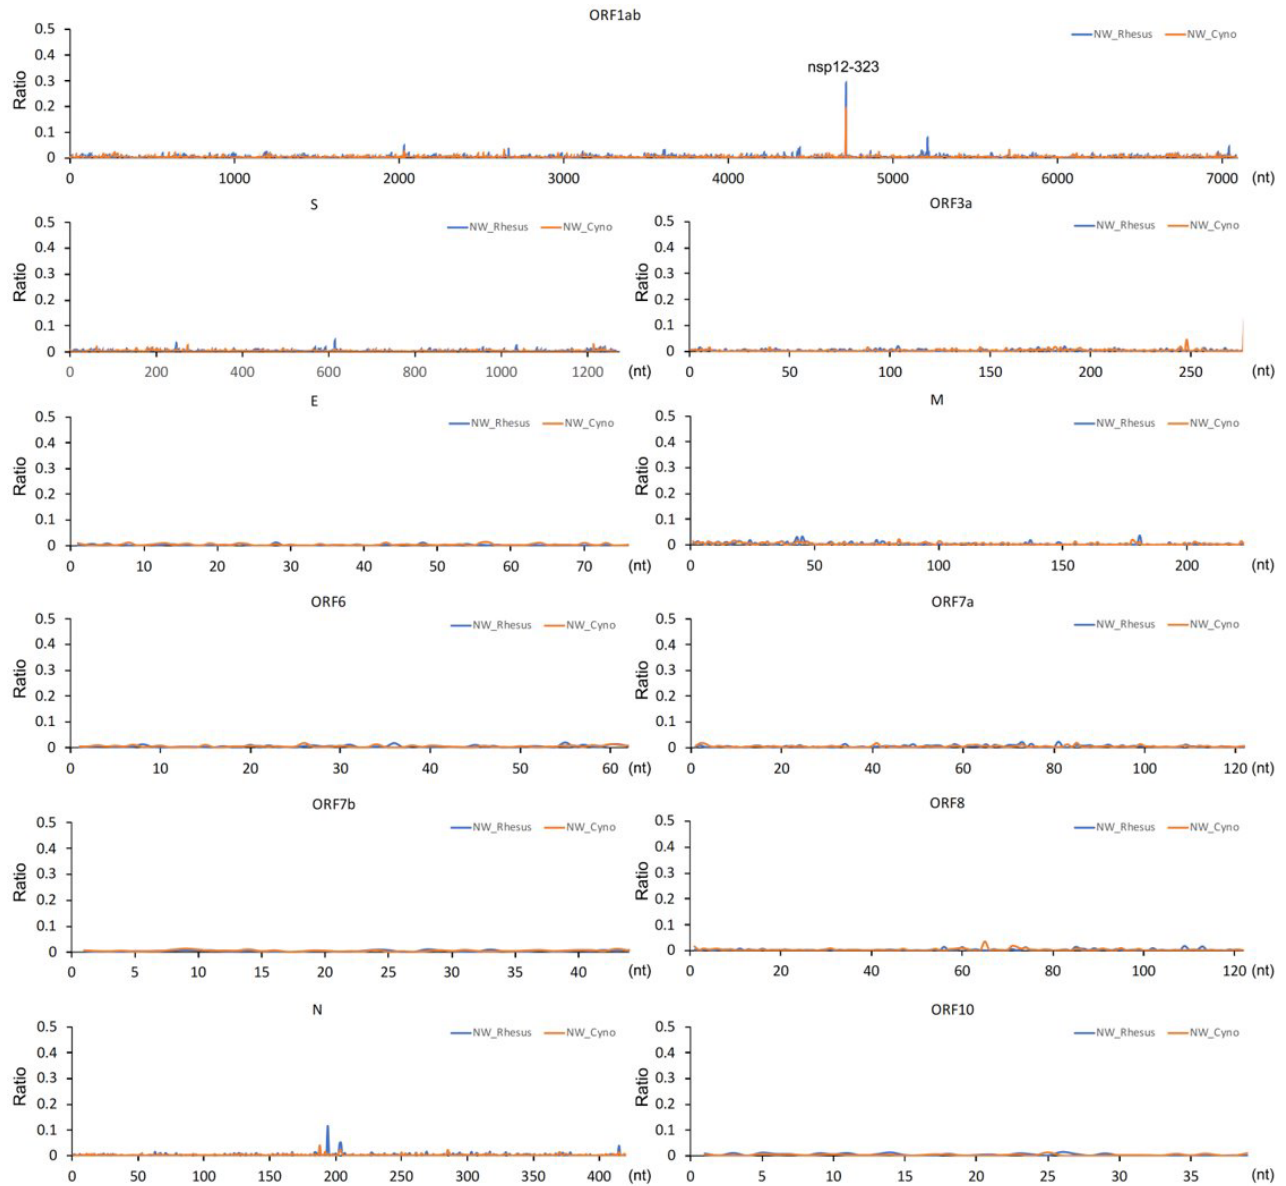

182

183 *Figure 4. Analysis of minor variant genomes in cynomolgus and rhesus macaques infected with*  
184 *the SARS-CoV-2 Victoria/01/202040 isolate using data from shotgun Illumina RNA sequencing of*  
185 *nasal washes (NW). Data presented as a global average over the course of the infection from*  
186 *sequencing SARS-CoV-2 from longitudinal samples. Each SARS-CoV-2 open reading frame is*  
187 *indicated above the appropriate panel. The major difference was at position 323 in NSP12.*

188

189 To determine how rapidly these mutations were selected in the individual animals, sequences  
190 from longitudinal samples were analyzed (Figure 5, showing ARTIC-Illumina data)  
191 (Supplementary Figure 1, showing both ARTIC-Illumina and ARTIC-Nanopore approaches and  
192 coverage). The sequencing data, using the two different approaches, showed that the P323L  
193 mutation was already present as a minor genomic variant (at higher levels than the inoculum)  
194 by Day 1 in some animals, as well as the presence of other minor genomic variants at this  
195 position. However, as infection progressed the frequency of the 323L minor genomic variant  
196 increased and became part of the dominant viral genome sequence by the end point of  
197 infection. This was the general pattern for all individual animals whether cynomolgus or rhesus  
198 macaque.

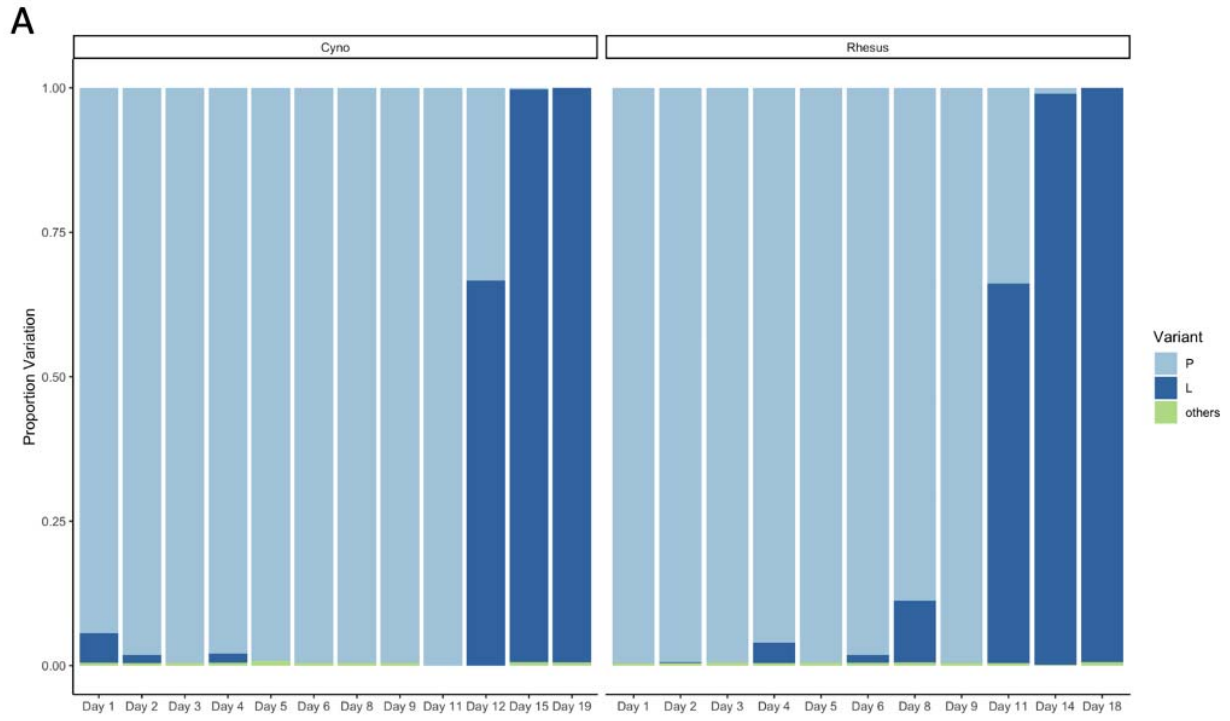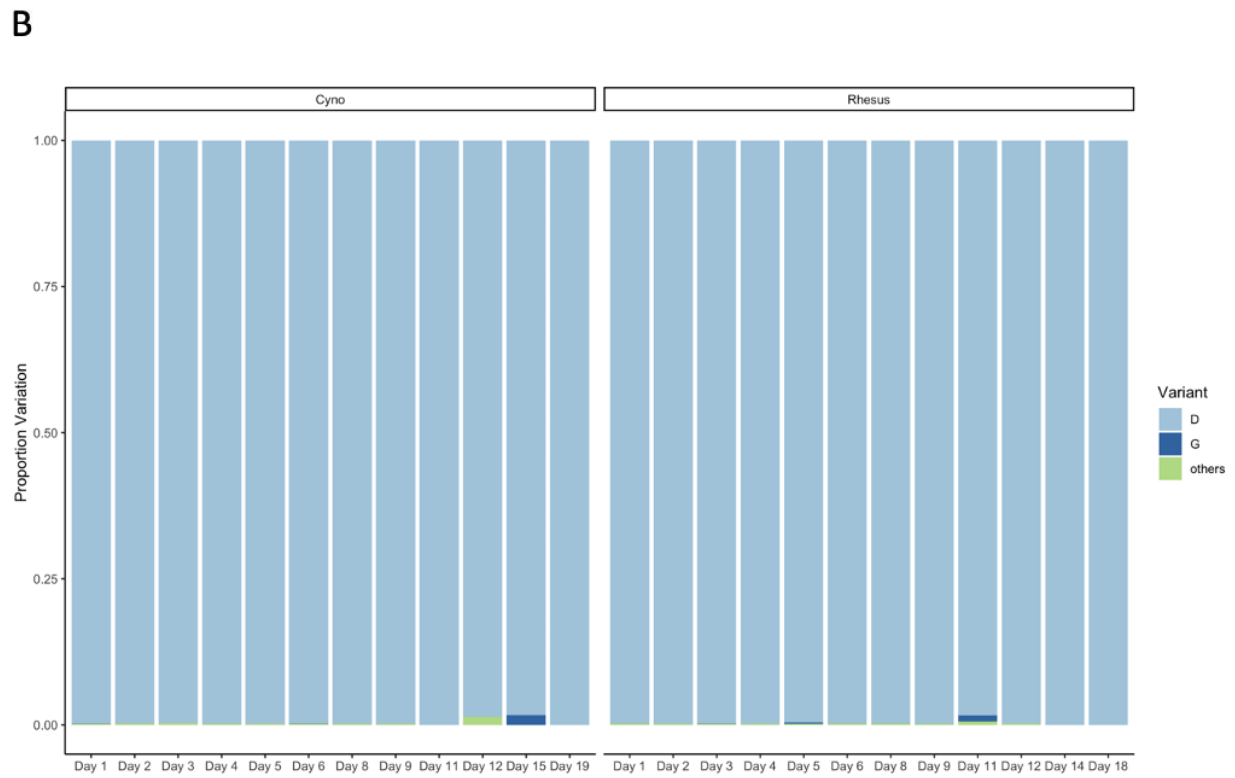

199

200



201 *Figure 5. Analysis of NSP12 position 323 (A) and the spike protein position 614 (B) in SARS-CoV-2*  
202 *from nasopharyngeal swabs taken longitudinally from infected cynomolgus and rhesus*  
203 *macaques. Data in this figure is from the ARTIC-Illumina approach to specifically amplify SARS-*  
204 *CoV-2 RNA. The day post infection is shown for the animals. In some cases, where there was*  
205 *more than one animal for each day, or usable sequence was obtained, the average value was*  
206 *calculated. For each position of interest either the P (for position 323 in NSP12) or D (for position*  
207 *614 in the spike protein) is shown in light blue, and the substitution of L or G, shown in dark*  
208 *blue, respectively. Green indicates other substitutions at that position. The left-hand y-axis*  
209 *indicates the % variation at the indicated position). The % variation was only shown for these*  
210 *sites with coverage > 5.*

211

212 **The P323L substitution in NSP12 confers a growth advantage in the context of a recombinant**  
213 **virus with 614G in the spike protein**

214 Previous data indicated that Victoria/01/202040 grew with a small plaque phenotype and lower  
215 titer compared to more contemporary variants including Variants of Concern (VOCs), that grew  
216 to higher titres with larger or mixed plaque morphologies <sup>17</sup>. The later virus isolates contained  
217 the P323L and D614G substitutions in NSP12 and the spike protein, respectively, as the  
218 dominant viral genome sequence, as well as other changes. To investigate whether the 323L  
219 substitution conferred an advantage over and above the 614G change in the spike protein, two  
220 recombinant viruses were created that were based on the 614G background, one with P323  
221 (Wuhan/614G/P323) and the other with 323L (Wuhan/614G/323L) in NSP12. Growth of these

222 two recombinant viruses were compared in cell culture by examining plaque morphology. The  
223 data indicated that Wuhan/614G/323L had a large plaque phenotype whereas  
224 Wuhan/614G/P323 had a small plaque phenotype (Figure 6), suggesting that the 323L  
225 substitution conferred a growth advantage.  
226

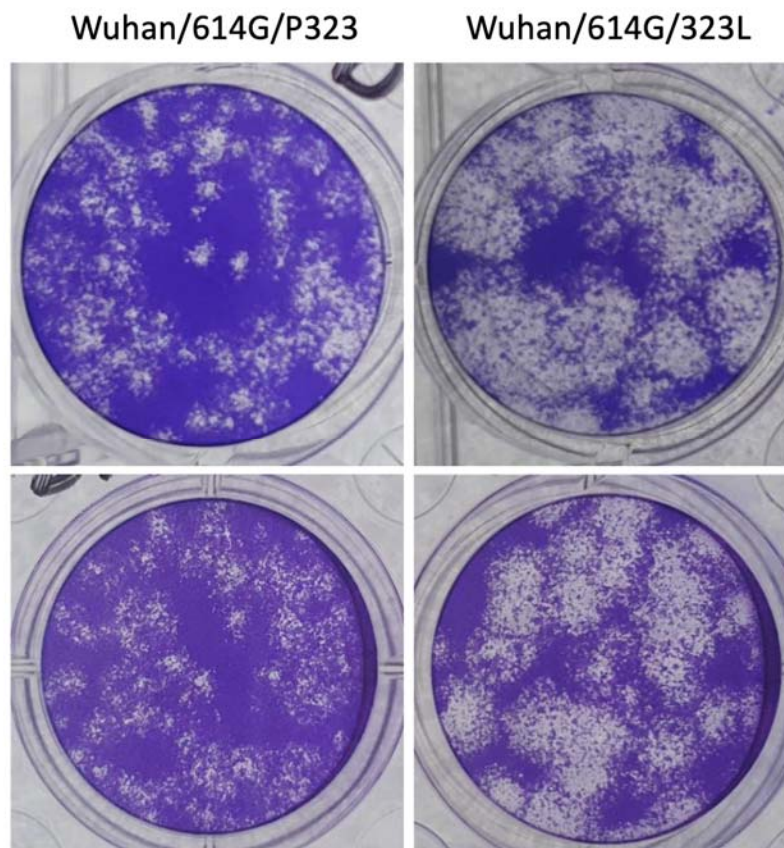

227  
228 *Figure 6. Representative images of plaques formed by two recombinant viruses that have the*  
229 *Wuhan-Hu-1 background (NC\_045512) and an engineered D614G substitution in the spike*  
230 *protein and differed at position 323 in NSP12 with either a P or L, these were termed*  
231 *Wuhan/614G/P323 and Wuhan/614G/323L, respectively.*

232 **Maintenance of variation at position 323 in NSP12 in the population**

233 Based on the experimental data presented in this study, we propose a model where the  
234 emergence and distribution of minor variant genomes and dominant viral genome sequence for  
235 SARS-CoV-2 is dependent on selection pressure and time post-infection at which a virus  
236 population is transmitted onwards to another individual (Figure 7).

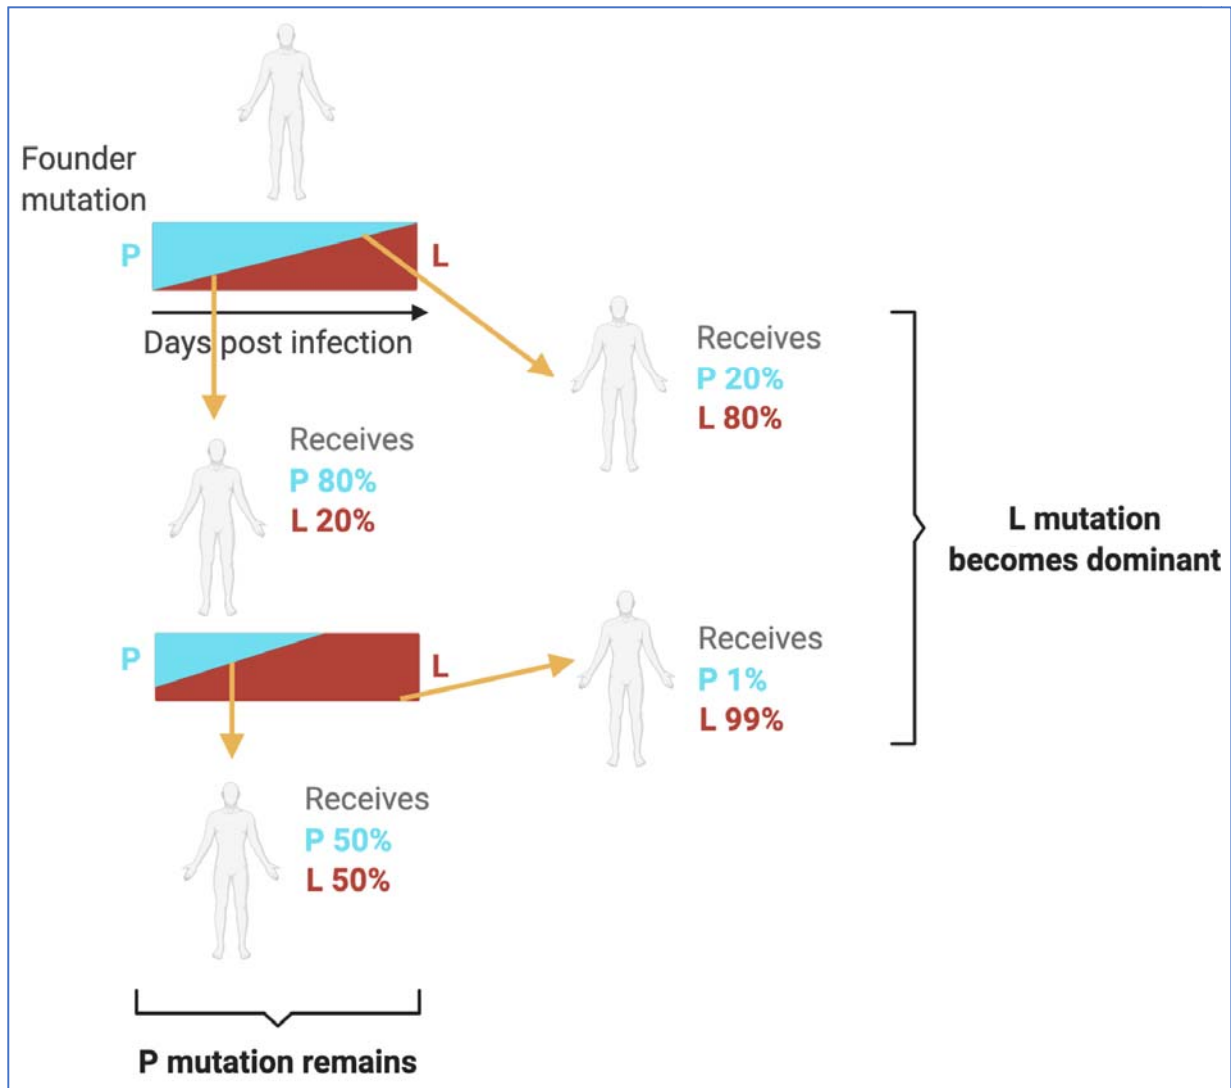

237

238 *Figure 7. Model for the transmission of variant genomes which encodes amino acids under*  
239 *strong selection pressure showing the potential options for growth and transmission of viral*

240 *populations with either consensus viral genomes with P323 (cyan) and 323L (red) present in*  
241 *minor variant genomes or in equilibrium or where 323L is in dominant viral genome sequence*  
242 *and P323 is present in the minor variant genomes. Given the potential strong selection pressure*  
243 *on this position the time post-infection transmission occurs is crucial in determining which*  
244 *variant becomes dominant viral genome sequence.*

245

246 One of the predictions of this model is that whilst 323L in NSP12 might now be part of the  
247 dominant viral genome sequence, other variants at this position will be present and persist (e.g.  
248 P323) at this position. To test this contemporary sequence data (post the P323L and D614G  
249 substitutions) that had been deposited between July and September 2021 on the Short Read  
250 Archive was examined for variation at position 323 in NSP12 (Figure 8). The data indicated that  
251 323L is the dominant variant, but P323 and other substitutions such as 323F are present as  
252 minor genomic variants.

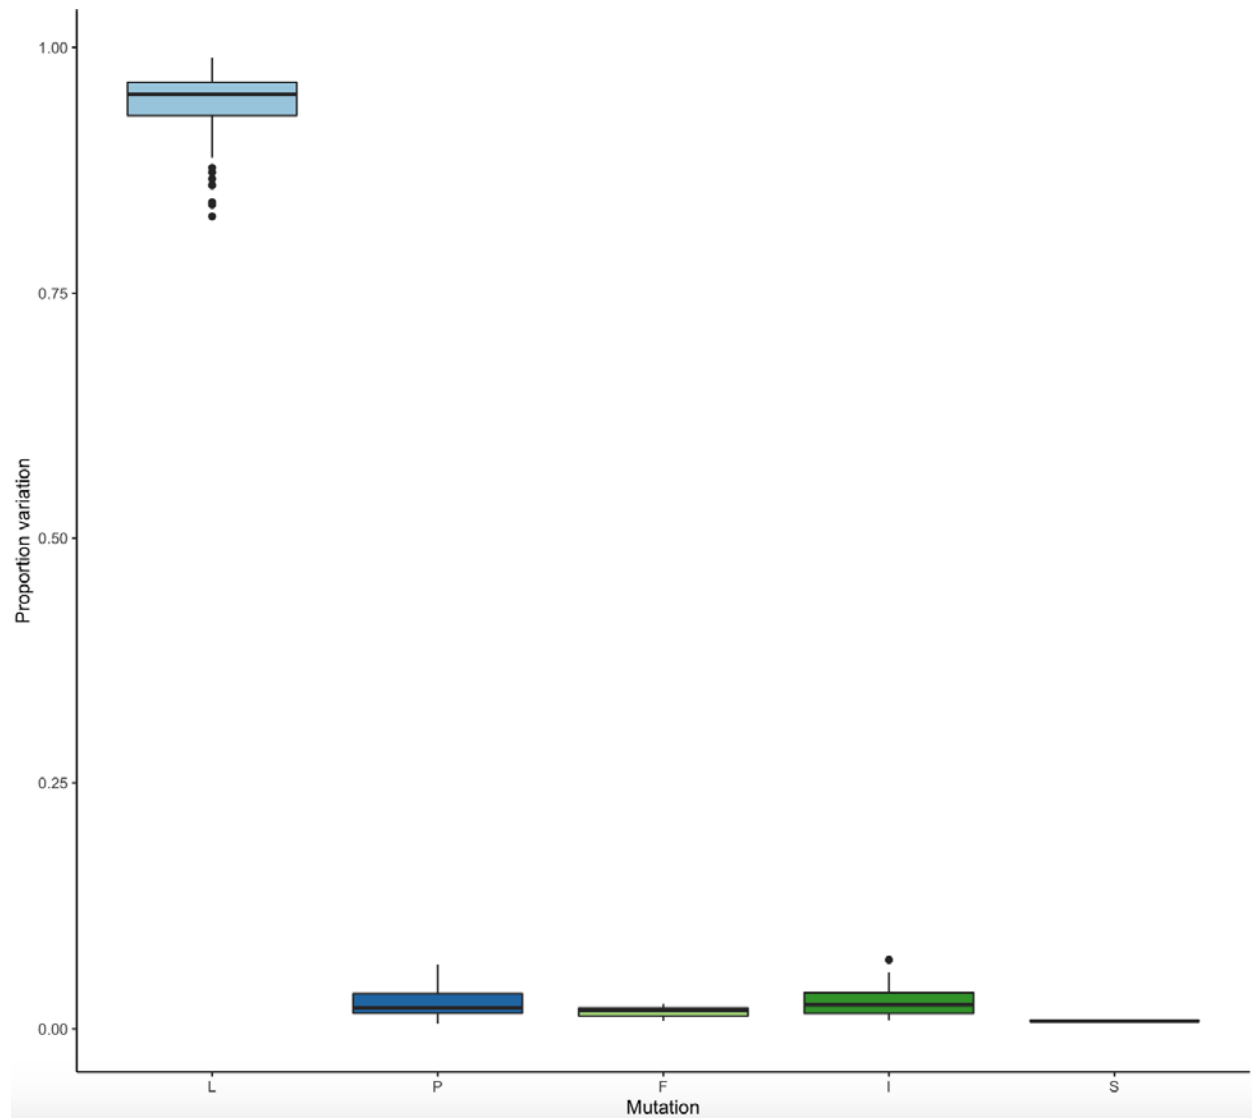

253

254 *Figure 8. Amino acid mutations at site 323 in NSP12 in samples sequenced using the ARTIC-*  
255 *Nanopore approach (n=101) from July-September 2021 obtained from the Short Read Archive.*  
256 *The bioinformatics tool DiversiTools was used to generate proportions of the counts of amino*  
257 *acids at site 323 and showed that L is dominant in viral sequences from mid-late 2021, with P*  
258 *remaining a small proportion of the population alongside amino acids F, S and I.*

## 259 Discussion

260 Several variants have come to dominate the global landscape of SARS-CoV-2 infections,  
261 including ones with the initial D614G and P323L polymorphisms in the spike protein and NSP12  
262 respectively (B.1), followed by Alpha (B.1.1.7), Delta (B.1.617.2) and Omicron (B.1.1529). These  
263 have occurred in waves and are likely linked to increases in transmissibility<sup>4</sup>, coupled with spike  
264 variation-mediated immune escape<sup>18,19</sup>, founder effects<sup>20-22</sup>, behaviour patterns of hosts and  
265 population density<sup>23,24</sup> and non-pharmaceutical interventions<sup>25</sup>. Whilst VoCs have differed in  
266 terms of transmissibility, in general there has been no marked change in inherent morbidity  
267 and mortality, although an early variant with a deletion in ORF8 was associated with a less  
268 severe inflammatory response and better patient outcome<sup>3</sup>.

269 Among the first major changes in the dominant viral genome sequence of SARS-CoV-2 were the  
270 P323L and the D614G substitutions in NSP12 and the spike protein, respectively. Focus has  
271 been placed on spike D614G and its association with increased infectivity<sup>26</sup>. We wanted to  
272 investigate the selection pressure at these two sites by analysing the virus population in  
273 humans over the period when the two substitutions became part of the dominant viral genome  
274 sequence, as well as studying this in two non-human primate animal models. The first analysis  
275 suggested rapid selection of P323L in NSP12 and D614G in the spike protein within humans.  
276 This was reflected in the substitutions 323L and 614G polymorphisms in the minor genomic  
277 variant population becoming the dominant viral genome sequence and replacing P323 and  
278 D614 within a few days of within host selection (Figure 2). At the population level, data  
279 suggested this selection was established over a two-month period in the UK (February and  
280 March 2020). We note that although samples used in this study were collected early in the

281 pandemic in the UK, during the containment phase and in the early surge phase of Wave 1,  
282 there was no evidence that the change from P323L in NSP12 and D614G in the spike protein  
283 resulted in an increase in disease severity.

284 The selection pressure at these two positions (within an isolate close to the original Wuhan  
285 outbreak) was evaluated in two non-human primate models for COVID-19 that recapitulate the  
286 mild disease observed in most humans<sup>13</sup>. Here, the SARS-CoV-2 variant used for infection had  
287 P323 in NSP12 and D614 in the spike protein in the dominant consensus sequence. At the  
288 minor variant genome level, 323L in NSP12 was present with a frequency of 0.03% and 614G in  
289 the spike protein at 0.02%. The sequence analysis indicated that for those animals where later  
290 time points returned usable viral genomic information, the dominant viral genome sequence  
291 now contained 323L in NSP12, but not necessarily 614G in the spike protein (Figure 5).

292 Recombinant viruses that differed at codon 323 in NSP12 in the context of a background with  
293 D614G in the spike protein and showed that the P323 virus grew with a smaller plaque  
294 morphology than a version with 323L. There are several different determinants of plaque size  
295 including those related to *in vitro* growth rate, evasion of antiviral responses and cell to cell  
296 fusion<sup>27,28</sup>. NSP12 has been shown to attenuate type I interferon production<sup>29</sup>, and this may be  
297 variant dependent. The mechanism behind the selection pressure acting on the P323L  
298 substitution in both humans and non-human primate animal models is unknown. However,  
299 NSP12 is the RNA dependent RNA polymerase, and such polymerase complexes can be  
300 composed of both viral and host cell proteins<sup>30,31</sup>. We speculate that the P323L substitution  
301 may alter the composition of the replication complex by altering interactions with the host cell  
302 proteome and thereby facilitating virus replication. Therefore, it is tempting to speculate that

303 growth of viruses in cell lines from the original host species might drive the selection back. This  
304 might provide a mechanism to narrow down candidates for the original zoonotic event(s).

305 In our model (Figure 7), an individual with the substitution present in a minor variant genome  
306 with a selective advantage will see an increase in the proportion of this genome as infection  
307 progresses. Under this pressure the minor variant genome will become the dominant viral  
308 genome sequence. If transmission occurs early in infection, then the variant will be maintained  
309 at a minor genomic variant level. If selective pressure is strong then the viral population that is  
310 being transmitted will have the substitution as part of the dominant viral genome sequence –  
311 and this will persist during further infections. Another consequence is that the sudden  
312 emergence of a substitution as part of the dominant genome sequence may be due to founder  
313 effect. For example, 323F in NSP12 that was identified in a cluster of cases in Northern Nevada  
314 and in Nigeria (B.1.525). However, this substitution has not become part of the global dominant  
315 viral genome sequence, despite that 323F was identified in samples from early 2020.

316 The data in this study indicates that in some cases it may be possible to predict the emergence  
317 of a new dominant viral genome sequence and hence new variant. This would be based on  
318 tracking the distribution and frequency of minor variant genomes at a population level, rather  
319 than just focusing on providing information on the dominant viral genome sequence e.g.,  
320 consensus level reporting. Whilst computationally more intensive and perhaps requiring higher  
321 quality samples and sequencing data, the ability to earlier predict a newly emerging variant of  
322 SARS-CoV-2 in the global landscape may aid in the evaluation of medical countermeasures and  
323 non-pharmaceutical interventions.



## 324 **Materials and methods**

### 325 **Illumina for NHP NW samples**

326 Total RNA in each sample was extracted with QIAmp viral RNA extraction kit and eluted in pure  
327 water. Following the manufacturer's protocols, total RNA was used as input material in to the  
328 QIAseq FastSelect -rRNA HMR (Qiagen) protocol to remove cytoplasmic and mitochondrial  
329 rRNA with a fragmentation time of 7 or 15 minutes. Subsequently, the NEBNext® Ultra™ II  
330 Directional RNA Library Prep Kit for Illumina® (New England Biolabs) was used to generate the  
331 RNA libraries, followed by 11 cycles of amplification and purification using AMPure XP beads.  
332 Each library was quantified using Qubit and the size distribution assessed using the Agilent 2100  
333 Bioanalyser, and the final libraries were pooled in equimolar ratios. The raw FASTQ files (2 x  
334 150 bp) generated by an Illumina® NovaSeq 6000 (Illumina®, San Diego, USA) were trimmed to  
335 remove Illumina adapter sequences using Cutadapt v1.2.1<sup>32</sup>. The option “-O 3” was set, so the  
336 that 3' end of any reads which matched the adapter sequence with greater than 3 bp was  
337 trimmed off. The reads were further trimmed to remove low quality bases, using Sickle v1.2.00  
338<sup>33</sup> with a minimum window quality score of 20. After trimming, reads shorter than 10 bp were  
339 removed.

340 The minor variations of amino acid in the genes of virus were called as our previous description  
341<sup>34</sup>. Hisat2 v2.1.0<sup>35</sup> was used to map the trimmed reads on the cynomolgus (*M. fascicularis*) and  
342 rhesus (*M. mulatta*) reference genome assemblies (release-94) downloaded from the Ensembl  
343 FTP site. The unmapped reads were extracted by bam2fastq (v1.1.0) and then mapped on the  
344 inoculum SARS-CoV-2 genome (GenBank sequence accession: NC\_045512.2) using Bowtie2

345 v2.3.5.1<sup>35</sup> by setting the options to parameters “--local -X 2000 --no-mixed”, followed by SAM  
346 file to BAM file conversion, sorting, and removal of the reads with a mapping quality score  
347 below 11 using SAMtools v1.9<sup>36</sup>. After that, the PCR and optical duplicate reads in the BAM  
348 files were discarded using the MarkDuplicates in the Picard toolkit v2.18.25  
349 (<http://broadinstitute.github.io/picard/>) with the option of “REMOVE\_DUPLICATES=true”. This  
350 BAM file was then processed by the diversiutils script in DiversiTools  
351 (<http://josephhughes.github.io/btctools/>) with the “-orfs” function to generate the number of  
352 amino acid changes caused by the nucleotide deviation at each site in the protein. In order to  
353 distinguish low frequency variants from Illumina sequence errors, the diversiutils script used  
354 the calling algorithms based on the Illumina quality scores to calculate a P-value for each  
355 variant at each nucleotide site<sup>37</sup>. The amino acid change was then filtered based on the P-value  
356 (<0.05) to remove the low frequency variants from Illumina sequence errors.

357

### 358 **ARTIC Illumina for longitudinal swab samples and NHP NW samples**

359 Samples from clinical specimens were processed at CL3 at the University of Liverpool as part of  
360 the study described in this chapter. Nasopharyngeal swabs were collected in viral transport  
361 media. Swabs were left to defrost in a Tripass I cabinet in CL3. The swab was removed from the  
362 tube and dipped in virkon before disposal to reduce dripping and aerosol generation. 250ml of  
363 viral transport media was removed from the swab sample and added to 750ml of Trizol LS  
364 (Invitrogen (10296028)) and mixed well. Remaining extraction was continued under CL2  
365 conditions. All RNA samples were then treated with Turbo DNase (Invitrogen). SuperScript IV  
366 (Invitrogen) was used to generate single-strand cDNA using random primer mix (NEB, Hitchin,

367 UK). ARTIC V3 PCR amplicons from the single-strand cDNA were generated following the  
368 Nanopore Protocol of PCR tiling of SARS-CoV-2 virus (Version:  
369 PTC\_9096\_v109\_revL\_06Feb2020). The amplicons products were then used in Illumina  
370 NEBNext Ultra II DNA Library preparation. Following 4 cycles of amplification the library was  
371 purified using Ampure XP beads and quantified using Qubit and the size distribution assessed  
372 using the Fragment Analyzer. Finally, the ARTIC library was sequenced on the Illumina®  
373 NovaSeq 6000 platform (Illumina®, San Diego, USA) following the standard workflow. The  
374 generated raw FASTQ files (2 x 250 bp) were trimmed to remove Illumina adapter sequences  
375 using Cutadapt v1.2.1 26. The option “-O 3” was set, so that the 3’ end of any reads which  
376 matched the adapter sequence with greater than 3 bp was trimmed off. The reads were further  
377 trimmed to remove low quality bases, using Sickle v1.200 27 with a minimum window quality  
378 score of 20. After trimming, reads shorter than 10 bp were removed. The NHP NW total RNA  
379 have been extracted and sequenced in our previous paper <sup>38</sup>.

380 The variations of amino acid in the genes of the virus were called as our previous description <sup>34</sup>.  
381 Hisat2 v2.1.0 <sup>35</sup> was used to map the trimmed reads onto the human reference genome  
382 assembly GRCh38 (release-91) downloaded from the Ensembl FTP site. The unmapped reads  
383 were extracted by bam2fastq (v1.1.0) and then mapped on a known SARS-CoV-2 genome  
384 (GenBank sequence accession: NC\_045512.2) using Bowtie2 v2.3.5.1 <sup>35</sup> by setting the options to  
385 parameters “--local -X 500 --no-mixed”, followed by SAM file to BAM file conversion, sorting,  
386 and removal of the reads with a mapping quality score below 11, not in pair, and not primary  
387 and supplementary alignment using SAMtools v1.9 <sup>36</sup>. Bamclipper (v 1.0.0) <sup>39</sup> was used to trim  
388 the ARTIC primer sequences on the mapped reads within the BAM files. The reads without

389 ARTIC primer sequences were also excluded in the further analysis. This trimmed BAM file was  
390 then processed by the `diversiutils` script in `DiversiTools`  
391 (<http://josephhughes.github.io/DiversiTools/>) with the “-orfs” function to generate the number  
392 of amino acid changes caused by the nucleotide deviation at each site in the protein in  
393 comparison to the reference SARS-CoV-2 genome (NC\_045512.2). In order to distinguish low  
394 frequency variants from Illumina sequence errors, the `diversiutils` script used the calling  
395 algorithms based on the Illumina quality scores to calculate a P-value for each variant at each  
396 nucleotide site <sup>37</sup>.

#### 397 **Rapid Sequencing Long Amplicons (RSLA) nanopore for longitudinal swab samples**

398 Total RNA of longitudinal swab samples were extracted as described above. Sequencing  
399 libraries for amplicons generated by RSLA <sup>14</sup> were prepared following the ‘PCR tiling of SARS-  
400 CoV-2 virus with Native Barcoding’ protocol provided by Oxford Nanopore Technologies using  
401 LSK109 and EXP-NBD104/114. The `artic-ncov2019` pipeline v1.2.1 ([https://artic.network/ncov-  
402 2019/ncov2019-bioinformatics-sop.html](https://artic.network/ncov-2019/ncov2019-bioinformatics-sop.html)) was used to filter the passed FASTQ files produced by  
403 Nanopore sequencing with lengths between 800 and 1600. This pipeline was then used to map  
404 the filtered reads on the reference SARS-CoV-2 genome (NC\_045512.2) by `minimap2` and  
405 assigned each read alignment to a derived amplicon and excluded primer sequences based on  
406 the RSLA primer schemes in the BAM files. These BAM files were further analysed using  
407 `DiversiTools` (<http://josephhughes.github.io/btctools/>) with the “-orfs” function to generate the  
408 ratio of amino acid change in the reads and coverage at each site of the protein in comparison  
409 to the reference SARS-CoV-2 genome (NC\_045512.2). The amino acids with highest ratio and  
410 coverage > 10 were used to assemble the consensus protein sequences.

411

## 412 **Sanger sequencing**

413 cDNA template was amplified using Q5 High-Fidelity DNA Polymerase following the PCR  
414 conditions: denaturation at 98°C for 30 sec followed by 39 cycles of 10 sec denaturation at  
415 98°C, 30 sec annealing at 66°C, and then 50 sec of extension at 72°C. A final extension step was  
416 done for 2 min at 72°C. The primer sets used for amplification were (SARS-CoV-  
417 2\_15\_LEFT=ATACGCCAACTTAGGTGAACG, SARS-CoV-2\_15\_RIGHT= AACATGTTG-TGCCAACACC)  
418 to detect the P323L mutation or (SARS-CoV-2\_24\_LEFT= TTGAACTTCTACATGCACCAGC, SARS-  
419 CoV-2\_RIGHT=CCAGAAGTGATTGTACCCGC) to detect the D614G mutation. PCR products were  
420 purified using AMPure XP beads (Beckman Coulter) and quantified using the Qubit High  
421 Sensitivity 1X dsDNA kit (Invitrogen). To visualise band quality, PCR products were run on a  
422 1.5% agarose gel. 10 ng of each amplified product was sent for sanger sequencing (Source  
423 Bioscience, UK).

424

## 425 **Cells**

426 African green monkey kidney C1008 (Vero E6) cells (Public Health England, PHE) were cultured  
427 in Dulbecco's minimal essential medium (DMEM) (Sigma) with 10% foetal bovine serum (FBS)  
428 (Sigma) and 0.05mg/ml gentamicin at 37°C/5% CO<sub>2</sub>. Vero/hSLAM cells (PHE) were grown in  
429 DMEM with 10% FBS and 0.05mg/ml gentamicin (Merck) with the addition of 0.4mg/ml  
430 Geneticin (G418; Thermofisher) at 37°C/5% CO<sub>2</sub>. Human ACE2-A549 (hACE2-A549), a lung  
431 epithelial cell line which overexpresses the ACE-2 receptor<sup>40</sup>, were cultured in DMEM with 10%

432 FBS and 0.05mg/ml gentamicin with the addition of 10µg/ml Blasticidin (Invitrogen). Only  
433 passage 3-10 cultures were used for experiments.

434

#### 435 **Generation and culture of recombinant viruses**

436 Recombinant SARS-CoV-2 viruses were generated by reverse genetics using the  
437 "transformation-associated recombination" in yeast approach <sup>41</sup>. 11 cDNA fragments with 70 bp  
438 end-terminal overlaps which spanned the entire SARS-CoV-2 isolate Wuhan-Hu-1 genome  
439 (GenBank accession: NC\_045512) were produced by GeneArt™ synthesis (Invitrogen™,  
440 ThermoFisher) as inserts in sequence verified, stable plasmid clones. The 5´ terminal cDNA  
441 fragment was modified to contain a T7 RNA polymerase promoter and an extra "G" nucleotide  
442 immediately upstream of the SARS-CoV-2 5´ sequence, whilst the 3´ terminal cDNA fragment  
443 was modified such that the 3´ end of the SARS-CoV-2 genome was followed by a stretch of 33  
444 "A"s followed by the unique restriction enzyme site Asc I. The inserts were amplified by PCR  
445 using a Platinum SuperFi II mastermix (ThermoFisher) and assembled into full length SARS-CoV-  
446 2 cDNA clones in the YAC vector pYESL1 using a GeneArt™ High-Order Genetic Assembly System  
447 (A13285, Invitrogen™, ThermoFisher) according to the manufacturer's instructions. RNA  
448 transcripts produced from the YAC clones by transcription with T7 polymerase were used to  
449 recover infectious virus. Two viruses were produced on the Wuhan-Hu-1 background and had a  
450 D614G substitution in the spike protein and differed at amino acid position 323 in NSP12 with  
451 either a P or L, these were termed Wuhan/614G/P323 and Wuhan/614G/323L, respectively.  
452 Whole genome sequencing confirmed the presence of these changes. Stocks of the viruses

453 were cultured in Vero E6 cells in DMEM containing 2% FBS, 0.05mg/ml gentamicin and  
454 harvested 72 hours post inoculation. Virus stocks were aliquoted and stored at -80°C. All stocks  
455 were titred by plaque assay on Vero E6 cells and pictures of the resulting plaques recorded.

456

#### 457 **Serial passage of SARS-CoV-2 Victoria/01/2020**

458 SARS-CoV-2 Victoria/01/2020 was passaged three times in Vero/hSLAM cells prior to receiving  
459 it. hACE2-A549 cells were then infected at an MOI of 0.01 and incubated for 72 hours (Passage  
460 4). Following this, 100µl was passaged to fresh cells and incubated at 37C for 1 hour. After the  
461 incubation, media was topped up with DMEM containing 2% FBS, 0.05mg/ml gentamicin and  
462 incubated for 72 hours (Passage 5). This process was repeated until Passage 13 (a total of ten  
463 passages through hACE2-A549 cells).

464

#### 465 **Analysis of global sequences from July-September 2021**

466 Sequences were obtained from the Short Read Archive (SRA) under accession numbers: ERR6343731,  
467 ERR6343734, ERR6343745, ERR6343747, ERR6343749, ERR6344225, ERR6346453, ERR6346456,  
468 ERR6346459, ERR6758978, ERR6758981, ERR6759296, ERR6761288, ERR6761458, ERR6761562,  
469 ERR6761570, ERR6761711, ERR6761986, ERR6762387, ERR6762545, ERR6762546, ERR6825821,  
470 ERR6878898, ERR6879599, ERR6879604, ERR6887797, ERR6887811, ERR6887812, ERR6887820,  
471 ERR6888048, ERR6888063, ERR6888078, ERR6888265, ERR6888283, SRR16376487, SRR16376490,  
472 SRR16376491, SRR16376494, SRR16376495, SRR16376496, SRR16376497, SRR16376501, SRR16376502,  
473 SRR16376505, SRR16376510, SRR16376515, SRR16376516, SRR16376522, SRR16376523, SRR16376524,

474 SRR16376526, SRR16376529, SRR16376530, SRR16376531, SRR16376536, SRR16376540, SRR16376543,  
475 SRR16376544, SRR16376547, SRR16376551, SRR16376552, SRR16376554, SRR16376557, SRR16376559,  
476 SRR16376573, SRR16376580, SRR16376589, SRR16376599, SRR16376608, SRR16376613, SRR16376614,  
477 SRR16376648, SRR16376678, SRR16376782, SRR16376802, SRR16376804, SRR16376807, SRR16376810,  
478 SRR16376884, SRR16376904, SRR16376907, SRR16376912, SRR16376913, SRR16376914, SRR16376916,  
479 SRR16376921, SRR16376922, SRR16376925, SRR16376927, SRR16376928, SRR16376929, SRR16376932,  
480 SRR16376935, SRR16376939, SRR16376940, SRR16376941, SRR16376943, SRR16376944, SRR16376946,  
481 SRR16376949, SRR16376951. All sequences were ARTIC-Nanopore sequenced using the V3 primer  
482 scheme and downloaded as SRA files. The SRA files were converted to FASTQ files using the SRA Toolkit  
483 v2.11.3 (<https://github.com/ncbi/sra-tools>) command fastq-dump. The FASTQ files were processed  
484 through the artic-ncov2019 v1.2.1 pipeline ([https://artic.network/ncov-2019/ncov2019-bioinformatics-](https://artic.network/ncov-2019/ncov2019-bioinformatics-sop.html)  
485 [sop.html](https://artic.network/ncov-2019/ncov2019-bioinformatics-sop.html)) and the DiversiTools tool (<https://github.com/josephhughes/DiversiTools>) as described above.



486 **References**

- 487 1 Worobey, M. *et al.* The emergence of SARS-CoV-2 in Europe and North America. *Science*  
488 **370**, 564-570, doi:10.1126/science.abc8169 (2020).
- 489 2 Davidson, A. D. *et al.* Characterisation of the transcriptome and proteome of SARS-CoV-  
490 2 reveals a cell passage induced in-frame deletion of the furin-like cleavage site from the  
491 spike glycoprotein. *Genome Med* **12**, 68, doi:10.1186/s13073-020-00763-0 (2020).
- 492 3 Young, B. E. *et al.* Effects of a major deletion in the SARS-CoV-2 genome on the severity  
493 of infection and the inflammatory response: an observational cohort study. *Lancet* **396**,  
494 603-611, doi:10.1016/S0140-6736(20)31757-8 (2020).
- 495 4 Hou, Y. J. *et al.* SARS-CoV-2 D614G variant exhibits efficient replication ex vivo and  
496 transmission in vivo. *Science*, doi:10.1126/science.abe8499 (2020).
- 497 5 Yang, H. C. *et al.* Analysis of genomic distributions of SARS-CoV-2 reveals a dominant  
498 strain type with strong allelic associations. *Proc Natl Acad Sci U S A*,  
499 doi:10.1073/pnas.2007840117 (2020).
- 500 6 Simmonds, P. Rampant C-->U Hypermutation in the Genomes of SARS-CoV-2 and Other  
501 Coronaviruses: Causes and Consequences for Their Short- and Long-Term Evolutionary  
502 Trajectories. *mSphere* **5**, doi:10.1128/mSphere.00408-20 (2020).

- 503 7 Ratcliff, J. & Simmonds, P. Potential APOBEC-mediated RNA editing of the genomes of  
504 SARS-CoV-2 and other coronaviruses and its impact on their longer term evolution.  
505 *Virology* **556**, 62-72, doi:10.1016/j.virol.2020.12.018 (2021).
- 506 8 Dong, X. *et al.* Identification and quantification of SARS-CoV-2 leader subgenomic mRNA  
507 gene junctions in nasopharyngeal samples shows phasic transcription in animal models  
508 of COVID-19 and dysregulation at later time points that can also be identified in  
509 humans. *bioRxiv*, 2021.2003.2003.433753, doi:10.1101/2021.03.03.433753 (2021).
- 510 9 Peacock, T. P., Penrice-Randal, R., Hiscox, J. A. & Barclay, W. S. SARS-CoV-2 one year on:  
511 evidence for ongoing viral adaptation. *J Gen Virol* **102**, doi:10.1099/jgv.0.001584 (2021).
- 512 10 Lythgoe, K. A. *et al.* SARS-CoV-2 within-host diversity and transmission. *Science* **372**,  
513 doi:10.1126/science.abg0821 (2021).
- 514 11 Dowall, S. D. *et al.* Elucidating variations in the nucleotide sequence of Ebola virus  
515 associated with increasing pathogenicity. *Genome Biol* **15**, 540, doi:10.1186/PREACCEPT-  
516 1724277741482641 (2014).
- 517 12 Dong, X. *et al.* Variation around the dominant viral genome sequence contributes to  
518 viral load and outcome in patients with Ebola virus disease. *Genome Biol* **21**, 238,  
519 doi:10.1186/s13059-020-02148-3 (2020).

- 520 13 Salguero, F. J. *et al.* Comparison of rhesus and cynomolgus macaques as an infection  
521 model for COVID-19. *Nat Commun* **12**, 1260, doi:10.1038/s41467-021-21389-9 (2021).
- 522 14 Moore, S. C. *et al.* Amplicon-Based Detection and Sequencing of SARS-CoV-2 in  
523 Nasopharyngeal Swabs from Patients With COVID-19 and Identification of Deletions in  
524 the Viral Genome That Encode Proteins Involved in Interferon Antagonism. *Viruses* **12**,  
525 doi:10.3390/v12101164 (2020).
- 526 15 Nasir, J. A. *et al.* A Comparison of Whole Genome Sequencing of SARS-CoV-2 Using  
527 Amplicon-Based Sequencing, Random Hexamers, and Bait Capture. *Viruses* **12**,  
528 doi:10.3390/v12080895 (2020).
- 529 16 Caly, L. *et al.* Isolation and rapid sharing of the 2019 novel coronavirus (SARS-CoV-2)  
530 from the first patient diagnosed with COVID-19 in Australia. *Med J Aust* **212**, 459-462,  
531 doi:10.5694/mja2.50569 (2020).
- 532 17 Prince, T. *et al.* Sequence analysis of SARS-CoV-2 in nasopharyngeal samples from  
533 patients with COVID-19 illustrates population variation and diverse phenotypes, placing  
534 the in vitro growth properties of B.1.1.7 and B.1.351 lineage viruses in context. *bioRxiv*,  
535 2021.2003.2030.437704, doi:10.1101/2021.03.30.437704 (2021).

- 536 18 Wang, B. *et al.* Resistance of SARS-CoV-2 variants to neutralization by convalescent  
537 plasma from early COVID-19 outbreak in Singapore. *NPJ Vaccines* **6**, 125,  
538 doi:10.1038/s41541-021-00389-2 (2021).
- 539 19 Saad-Roy, C. M. *et al.* Epidemiological and evolutionary considerations of SARS-CoV-2  
540 vaccine dosing regimes. *Science* **372**, 363-370, doi:10.1126/science.abg8663 (2021).
- 541 20 Gomez-Carballa, A., Bello, X., Pardo-Seco, J., Martinon-Torres, F. & Salas, A. Mapping  
542 genome variation of SARS-CoV-2 worldwide highlights the impact of COVID-19 super-  
543 spreaders. *Genome Res* **30**, 1434-1448, doi:10.1101/gr.266221.120 (2020).
- 544 21 Diez-Fuertes, F. *et al.* A Founder Effect Led Early SARS-CoV-2 Transmission in Spain. *J*  
545 *Virology* **95**, doi:10.1128/JVI.01583-20 (2021).
- 546 22 Tasakis, R. N. *et al.* SARS-CoV-2 variant evolution in the United States: High  
547 accumulation of viral mutations over time likely through serial Founder Events and  
548 mutational bursts. *PLoS One* **16**, e0255169, doi:10.1371/journal.pone.0255169 (2021).
- 549 23 Ward, T. *et al.* Growth, reproduction numbers and factors affecting the spread of SARS-  
550 CoV-2 novel variants of concern in the UK from October 2020 to July 2021: a modelling  
551 analysis. *BMJ Open* **11**, e056636, doi:10.1136/bmjopen-2021-056636 (2021).

- 552 24 Rader, B. *et al.* Crowding and the shape of COVID-19 epidemics. *Nat Med* **26**, 1829-1834,  
553 doi:10.1038/s41591-020-1104-0 (2020).
- 554 25 Kraemer, M. U. G. *et al.* Spatiotemporal invasion dynamics of SARS-CoV-2 lineage B.1.1.7  
555 emergence. *Science* **373**, 889-895, doi:10.1126/science.abj0113 (2021).
- 556 26 Korber, B. *et al.* Tracking Changes in SARS-CoV-2 Spike: Evidence that D614G Increases  
557 Infectivity of the COVID-19 Virus. *Cell* **182**, 812-827 e819, doi:10.1016/j.cell.2020.06.043  
558 (2020).
- 559 27 Goh, K. C. *et al.* Molecular determinants of plaque size as an indicator of dengue virus  
560 attenuation. *Sci Rep* **6**, 26100, doi:10.1038/srep26100 (2016).
- 561 28 Kato, F. *et al.* Characterization of large and small-plaque variants in the Zika virus clinical  
562 isolate ZIKV/Hu/S36/Chiba/2016. *Sci Rep* **7**, 16160, doi:10.1038/s41598-017-16475-2  
563 (2017).
- 564 29 Wang, W. *et al.* SARS-CoV-2 nsp12 attenuates type I interferon production by inhibiting  
565 IRF3 nuclear translocation. *Cell Mol Immunol* **18**, 945-953, doi:10.1038/s41423-020-  
566 00619-y (2021).
- 567 30 Munday, D. C. *et al.* Interactome analysis of the human respiratory syncytial virus RNA  
568 polymerase complex identifies protein chaperones as important cofactors that promote

- 569 L-protein stability and RNA synthesis. *J Virol* **89**, 917-930, doi:10.1128/JVI.01783-14  
570 (2015).
- 571 31 Noton, S. L., Aljabr, W., Hiscox, J. A., Matthews, D. A. & Fearn, R. Factors affecting de  
572 novo RNA synthesis and back-priming by the respiratory syncytial virus polymerase.  
573 *Virology* **462-463**, 318-327, doi:10.1016/j.virol.2014.05.032 (2014).
- 574 32 Martin, M. Cutadapt removes adapter sequences from high-throughput sequencing  
575 reads. *EMBnet. journal* **17**, 10-12 (2011).
- 576 33 Joshi, N. & Fass, J. (2011).
- 577 34 Dong, X. *et al.* Variation around the dominant viral genome sequence contributes to  
578 viral load and outcome in patients with Ebola virus disease. *Genome biology* **21**, 1-20  
579 (2020).
- 580 35 Kim, D., Langmead, B. & Salzberg, S. L. HISAT: a fast spliced aligner with low memory  
581 requirements. *Nature methods* **12**, 357 (2015).
- 582 36 Li, H. *et al.* The sequence alignment/map format and SAMtools. *Bioinformatics* **25**, 2078-  
583 2079 (2009).

- 584 37 Morelli, M. J. *et al.* Evolution of foot-and-mouth disease virus intra-sample sequence  
585 diversity during serial transmission in bovine hosts. *Veterinary research* **44**, 12 (2013).
- 586 38 Dong, X. *et al.* Identification and quantification of SARS-CoV-2 leader subgenomic mRNA  
587 gene junctions in nasopharyngeal samples shows phasic transcription in animal models  
588 of COVID-19 and aberrant patterns in humans. *bioRxiv* (2021).
- 589 39 Au, C. H., Ho, D. N., Kwong, A., Chan, T. L. & Ma, E. S. BAMClipper: removing primers  
590 from alignments to minimize false-negative mutations in amplicon next-generation  
591 sequencing. *Scientific reports* **7**, 1-7 (2017).
- 592 40 Buchrieser, J. *et al.* Syncytia formation by SARS-CoV-2-infected cells. *EMBO J* **39**,  
593 e106267, doi:10.15252/emj.2020106267 (2020).
- 594 41 Thi Nhu Thao, T. *et al.* Rapid reconstruction of SARS-CoV-2 using a synthetic genomics  
595 platform. *Nature* **582**, 561-565, doi:10.1038/s41586-020-2294-9 (2020).
- 596

## 597 **Acknowledgments**

598 We would like to thank all members of the Hiscox Laboratory and the Centre for  
599 Genome Research for supporting SARS-CoV-2/COVID-19 sequencing research and members of  
600 ISARIC4C consortia (see supplementary information and <https://isaric4c.net/about/authors/>).

601 The authors would like to thank J. Druce and M.G. Catton from the Victorian Infectious Diseases  
602 Reference Laboratory, Royal Melbourne Hospital, at the Peter Doherty Institute for Infection  
603 and Immunity, Victoria, 3000, Australia, for providing the SARS-CoV-2 isolate used in this study.

604 We would like to thank Oliver Schwartz for the gift of ACE2-A549 cells. This work was funded by  
605 U.S. Food and Drug Administration Medical Countermeasures Initiative contract  
606 (75F40120C00085) to JAH with Co-Is, MWC, ADD, AD, DAM, MGS and LT. The article reflects the  
607 views of the authors and does not represent the views or policies of the FDA. The non-human  
608 primate work was funded by the Coalition of Epidemic Preparedness Innovations (CEPI) and the  
609 Medical Research Council Project CV220-060, "Development of an NHP model of infection and  
610 ADE with COVID-19 (SARS-CoV-2) both awarded to MWC. This work was also supported by the  
611 MRC (MR/W005611/1) G2P-UK: A national virology consortium to address phenotypic  
612 consequences of SARS-CoV-2 genomic variation (co-Is ADD and JAH). JAH is also funded by the  
613 Centre of Excellence in Infectious Diseases Research (CEIDR) and the Alder Hey Charity. The  
614 ISARIC4C sample collection and sequencing in this study was supported by grants from the  
615 Medical Research Council (grant MC\_PC\_19059), the National Institute for Health Research  
616 (NIHR; award CO-CIN-01) and the Medical Research Council (MRC; grant MC\_PC\_19059). JAH,  
617 MGS, MWC and LT are supported by the NIHR Health Protection Research Unit (HPRU) in  
618 Emerging and Zoonotic Infections at University of Liverpool in partnership with the UK Health



619 Security Agency (UK-HSA), in collaboration with Liverpool School of Tropical Medicine and the  
620 University of Oxford (award 200907). LT is supported by a Wellcome Trust fellowship  
621 [205228/Z/16/Z]. PD and JKB acknowledge Institute Strategic Programme grant (no.  
622 BB/P013740/1) from the BBSRC.

623

#### 624 **Author contributions**

625 Conceptualization: DAM, AD, MWC and JAH. Data curation: HG, XD, RP-R, DAM, AD and JAH.  
626 Formal analysis: HG, XD, NR, RP-R, PD, ADD, TP, AD and JAH. Funding acquisition: MGS, PJMO,  
627 JKB, DAM, LT, AD, ADD, MWC and JAH. Investigation: HG, XD, NR, RP-R, ADD, GTS, BJ, MKW,  
628 ME, JB, TJ, FJS, SRE, JT, CH and JAH. Methodology: HG, XD, GTS, RP-R, ADD, MKW, FJS and JT.  
629 Project administration: JAH. Resources: MWC, FJS, JT, YH, MGS, PJMO, ADD, JKB, LT. Software:  
630 HG, XD, RP-R, DAM and AD. Supervision: MWC, AD, ADD, SRE and JAH. Validation: HG, XD, RP-R,  
631 NR, CH, GTS, DAM, AD and JAH. Visualisation: HG, XD and RP-R. Writing – original draft: HG, XD,  
632 RP-R and JAH. Writing – reviewing and editing. HG, XD, RP-R, DAM, AD, LT, ADD, MWC and JAH.

633

#### 634 **Availability of data and materials**

635 All viral sequence data used in this analysis were deposited with the National Center for  
636 Biotechnology Information under the project accession number PRJNA789459 and can be  
637 accessed via <https://www.ncbi.nlm.nih.gov/bioproject/PRJNA789459>.

638

#### 639 **Competing interests**

640 The authors declare that they have no competing interests.

641

642 **Ethics approval and consent to participate**

643 Patients were recruited under the International Severe Acute Respiratory and emerging  
644 Infection Consortium (ISARIC) Clinical Characterisation Protocol CCP (<https://isaric.net/ccp>) by  
645 giving informed consent. ISARIC CCP was reviewed and approved by the national research  
646 ethics service, Oxford (13/SC/0149). All experimental work on non-human primates was  
647 conducted under the authority of a UK Home Office approved project license (PDC57C033) that  
648 had been subject to local ethical review at PHE Porton Down by the Animal Welfare and Ethical  
649 Review Body (AWERB) and approved as required by the Home Office Animals (Scientific  
650 Procedures) Act 1986. None of the animals had been used previously for experimental  
651 procedures.

652 **Supplementary information**

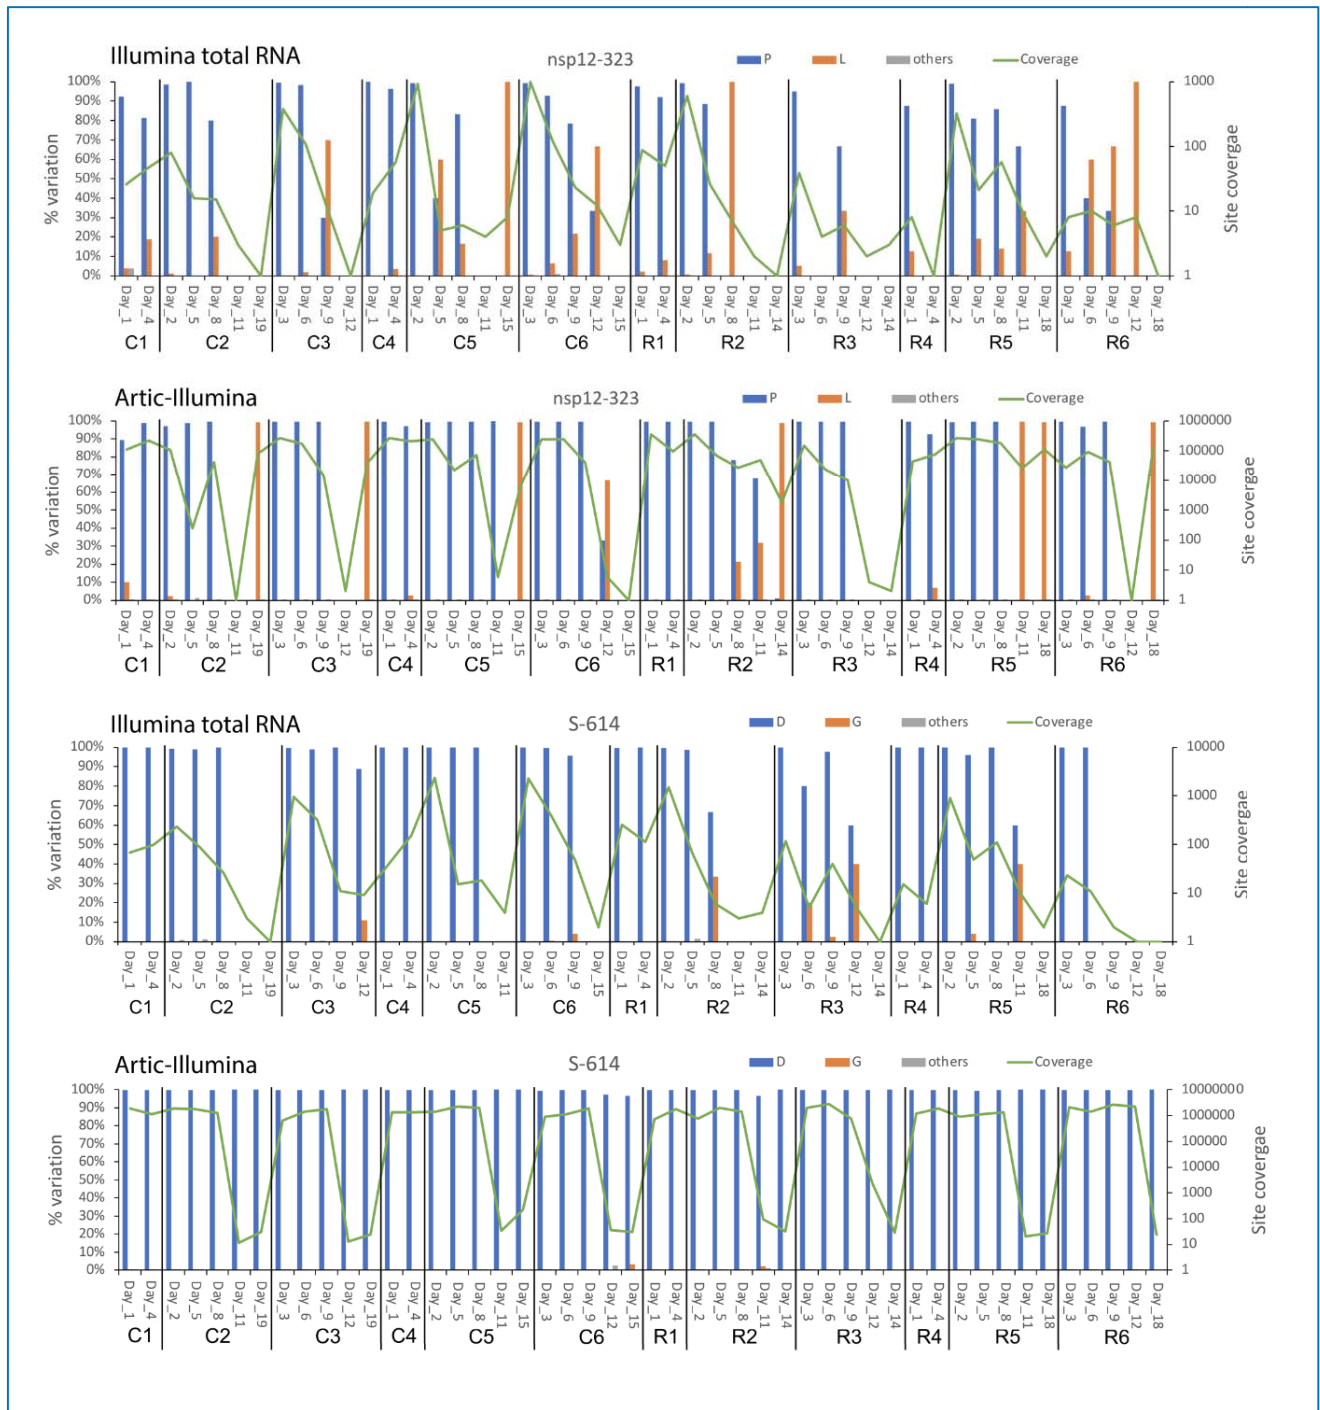

653

654 *Supplementary Figure 1. Analysis of NSP12 position 323 and the spike protein position 614 in*

655 *SARS-CoV-2 from nasopharyngeal swabs taken longitudinally from infected cynomolgus (C) and*

656 *rhesus (R) macaques. Sequencing was performed using both an Illumina shot gun sequencing*  
657 *approach (Illumina total RNA) or using an ARTIC-Illumina approach to specifically amplify SARS-*  
658 *CoV-2 RNA. The day post infection is shown for each individual animal (number after the C or R)*  
659 *(x-axis). For each position of interest either the P (for position 323 in NSP12) or D (for position*  
660 *614 in the spike protein) is shown in blue, and the substitution of L or G, shown in orange,*  
661 *respectively. Grey indicates other substitutions at that position. The left-hand y-axis indicates*  
662 *the % variation at the indicated position and the right-hand x-axis shows amino acid site*  
663 *coverage for each position (green line). The % variation was only shown for these sites with*  
664 *coverage > 5.*

665

666 Supplementary information

667 ISARIC4C Investigators

668 Consortium Lead Investigator: J Kenneth Baillie.

669

670 Chief Investigator: Malcolm G Semple.

671

672 Co-Lead Investigator: Peter JM Openshaw.

673

674 ISARIC Clinical Coordinator: Gail Carson.

675

676 Co-Investigator: Beatrice Alex, Petros Andrikopoulos, Benjamin Bach, Wendy S Barclay, Debby

677 Bogaert, Meera Chand, Kanta Chechi, Graham S Cooke, Ana da Silva Filipe, Thushan de Silva,

678 Annemarie B Docherty, Gonçalo dos Santos Correia, Marc-Emmanuel Dumas, Jake Dunning,

679 Tom Fletcher, Christopher A Green, William Greenhalf, Julian L Griffin, Rishi K Gupta, Ewen M

680 Harrison, Julian A Hiscox, Antonia Ying Wai Ho, Peter W Horby, Samreen Ijaz, Saye Khoo, Paul

681 Klenerman, Andrew Law, Matthew R Lewis, Sonia Liggi, Wei Shen Lim, Lynn Maslen, Alexander J

682 Mentzer, Laura Merson, Alison M Meynert, Shona C Moore, Mahdad Noursadeghi, Michael

683 Olanipekun, Anthonia Osagie, Massimo Palmarini, Carlo Palmieri, William A Paxton, Georgios  
684 Pollakis, Nicholas Price, Andrew Rambaut, David L Robertson, Clark D Russell, Vanessa Sancho-  
685 Shimizu, Caroline J Sands, Janet T Scott, Louise Sigfrid, Tom Solomon, Shiranee Sriskandan,  
686 David Stuart, Charlotte Summers, Olivia V Swann, Zoltan Takats, Panteleimon Takis, Richard S  
687 Tedder, AA Roger Thompson, Emma C Thomson, Ryan S Thwaites, Lance CW Turtle, Maria  
688 Zambon.

689

690 Project Manager: Hayley Hardwick, Chloe Donohue, Fiona Griffiths, Wilna Oosthuyzen.

691

692 Project Administrator: Cara Donegan, Rebecca G. Spencer.

693

694 Data Analyst: Lisa Norman , Riinu Pius, Thomas M Drake, Cameron J Fairfield, Stephen R Knight,  
695 Kenneth A Mclean, Derek Murphy, Catherine A Shaw.

696

697 Data and Information System Manager: Jo Dalton, Michelle Girvan, Egle Saviciute, Stephanie  
698 Roberts, Janet Harrison, Laura Marsh, Marie Connor, Sophie Halpin, Clare Jackson, Carrol  
699 Gamble, Daniel Plotkin, James Lee.

700

701 Data Integration and Presentation: Gary Leeming, Andrew Law, Murray Wham, Sara Clohisey,  
702 Ross Hendry, James Scott-Brown.

703

704 Material Management: Victoria Shaw, Sarah E McDonald.

705

706 Patient Engagement: Seán Keating.

707

708 Outbreak Laboratory Staff and Volunteers: Katie A. Ahmed, Jane A Armstrong, Milton  
709 Ashworth, Innocent G Asimwe, Siddharth Bakshi, Samantha L Barlow, Laura Booth, Benjamin  
710 Brennan, Katie Bullock, Benjamin WA Catterall, Jordan J Clark, Emily A Clarke, Sarah Cole, Louise  
711 Cooper, Helen Cox, Christopher Davis, Oslem Dincarslan, Chris Dunn, Philip Dyer, Angela Elliott,  
712 Anthony Evans, Lorna Finch, Lewis WS Fisher, Terry Foster, Isabel Garcia-Dorival, Philip  
713 Gunning, Catherine Hartley, Rebecca L Jensen, Christopher B Jones, Trevor R Jones, Shadia  
714 Khandaker, Katharine King, Robyn T. Kiy, Chrysa Koukorava, Annette Lake, Suzannah Lant, Diane  
715 Latawiec, Lara Lavelle-Langham, Daniella Lefteri, Lauren Lett, Lucia A Livoti, Maria Mancini,  
716 Sarah McDonald, Laurence McEvoy, John McLauchlan, Soeren Metelmann, Nahida S Miah,  
717 Joanna Middleton, Joyce Mitchell, Shona C Moore, Ellen G Murphy, Rebekah Penrice-Randal,  
718 Jack Pilgrim, Tessa Prince, Will Reynolds, P. Matthew Ridley, Debby Sales, Victoria E Shaw,  
719 Rebecca K Shears, Benjamin Small, Krishanthi S Subramaniam, Agnieska Szemiel, Aislynn

720 Taggart, Jolanta Tanianis-Hughes, Jordan Thomas, Erwan Trochu, Libby van Tonder, Eve  
721 Wilcock, J. Eunice Zhang, Lisa Flaherty, Nicole Maziere, Emily Cass, Alejandra Doce Carracedo,  
722 Nicola Carlucci, Anthony Holmes, Hannah Massey.

723

724 Edinburgh Laboratory Staff and Volunteers: Lee Murphy, Sarah McCafferty, Richard Clark, Angie  
725 Fawkes, Kirstie Morrice, Alan Maclean, Nicola Wrobel, Lorna Donnelly, Audrey Coutts,  
726 Katarzyna Hafezi, Louise MacGillivray, Tammy Gilchrist.

727

728 Local Principal Investigators: Kayode Adeniji, Daniel Agranoff, Ken Agwuh, Dhiraj Ail, Erin L.  
729 Aldera, Ana Alegria, Sam Allen, Brian Angus, Abdul Ashish, Dougal Atkinson, Shahedal Bari,  
730 Gavin Barlow, Stella Barnass, Nicholas Barrett, Christopher Bassford, Sneha Basude, David  
731 Baxter, Michael Beadsworth, Jolanta Bernatoniene, John Berridge, Colin Berry, Nicola Best,  
732 Pieter Bothma, David Chadwick, Robin Brittain-Long, Naomi Bulteel, Tom Burden, Andrew  
733 Burtenshaw, Vikki Caruth, David Chadwick, Duncan Chamblor, Nigel Chee, Jenny Child, Srikanth  
734 Chukkambotla, Tom Clark, Paul Collini, Catherine Cosgrove, Jason Cupitt, Maria-Teresa Cutino-  
735 Moguel, Paul Dark, Chris Dawson, Samir Dervisevic, Phil Donnison, Sam Douthwaite, Andrew  
736 Drummond, Ingrid DuRand, Ahilanadan Dushianthan, Tristan Dyer, Cariad Evans, Chi Eziefula,  
737 Chrisopher Fegan, Adam Finn, Duncan Fullerton, Sanjeev Garg, Sanjeev Garg, Atul Garg,  
738 Effrossyni Gkrania-Klotsas, Jo Godden, Arthur Goldsmith, Clive Graham, Elaine Hardy, Stuart  
739 Hartshorn, Daniel Harvey, Peter Havalda, Daniel B Hawcutt, Maria Hobrok, Luke Hodgson, Anil



740 Hormis, Michael Jacobs, Susan Jain, Paul Jennings, Agilan Kaliappan, Vidya Kasipandian,  
741 Stephen Kegg, Michael Kelsey, Jason Kendall, Caroline Kerrison, Ian Kerslake, Oliver Koch, Gouri  
742 Koduri, George Koshy, Shondipon Laha, Steven Laird, Susan Larkin, Tamas Leiner, Patrick Lillie,  
743 James Limb, Vanessa Linnett, Jeff Little, Mark Lyttle, Michael MacMahon, Emily MacNaughton,  
744 Ravish Mankregod, Huw Masson, Elijah Matovu, Katherine McCullough, Ruth McEwen, Manjula  
745 Meda, Gary Mills, Jane Minton, Mariyam Mirfenderesky, Kavya Mohandas, Quen Mok, James  
746 Moon, Elinoor Moore, Patrick Morgan, Craig Morris, Katherine Mortimore, Samuel Moses,  
747 Mbiye Mpenge, Rohinton Mulla, Michael Murphy, Megan Nagel, Thapas Nagarajan, Mark  
748 Nelson, Lillian Norris, Matthew K. O'Shea, Igor Otahal, Marlies Ostermann, Mark Pais, Carlo  
749 Palmieri, Selva Panchatsharam, Danai Papakonstantinou, Hassan Paraiso, Brij Patel, Natalie  
750 Pattison, Justin Pepperell, Mark Peters, Mandeep Phull, Stefania Pintus, Jagtur Singh Pooni, Tim  
751 Planche, Frank Post, David Price, Rachel Prout, Nikolas Rae, Henrik Reschreiter, Tim Reynolds,  
752 Neil Richardson, Mark Roberts, Devender Roberts, Alistair Rose, Guy Rousseau, Bobby Ruge,  
753 Brendan Ryan, Taranprit Saluja, Matthias L Schmid, Aarti Shah, Prad Shanmuga, Anil Sharma,  
754 Anna Shawcross, Jeremy Sizer, Manu Shankar-Hari, Richard Smith, Catherine Snelson, Nick  
755 Spittle, Nikki Staines, Tom Stambach, Richard Stewart, Pradeep Subudhi, Tamas Szakmany, Kate  
756 Tatham, Jo Thomas, Chris Thompson, Robert Thompson, Ascanio Tridente, Darell Tupper-Carey,  
757 Mary Twagira, Nick Vallotton, Rama Vancheeswaran, Lisa Vincent-Smith, Shico Visuvanathan,  
758 Alan Vuylsteke, Sam Waddy, Rachel Wake, Andrew Walden, Ingeborg Welters, Tony  
759 Whitehouse, Paul Whittaker, Ashley Whittington, Padmasayee Papineni, Meme Wijesinghe,  
760 Martin Williams, Lawrence Wilson, Sarah Cole, Stephen Winchester, Martin Wiselka, Adam  
761 Wolverson, Daniel G Wootton, Andrew Workman, Bryan Yates, Peter Young.
